# Supplementary material for: The super-healing MRL strain promotes muscle growth in muscular dystrophy through a regenerative extracellular matrix
Source: PubMed Central journal article supplement — bioRxiv. 2023 Jun 30:2023.06.29.547098. Preprint. [Version 1] doi: 10.1101/2023.06.29.547098 (PMC10327155; doi:10.1101/2023.06.29.547098), 2023-06-30
Supplement: media-1.pdf [file media-1.pdf]

**SUPPLEMENTAL INFORMATION**

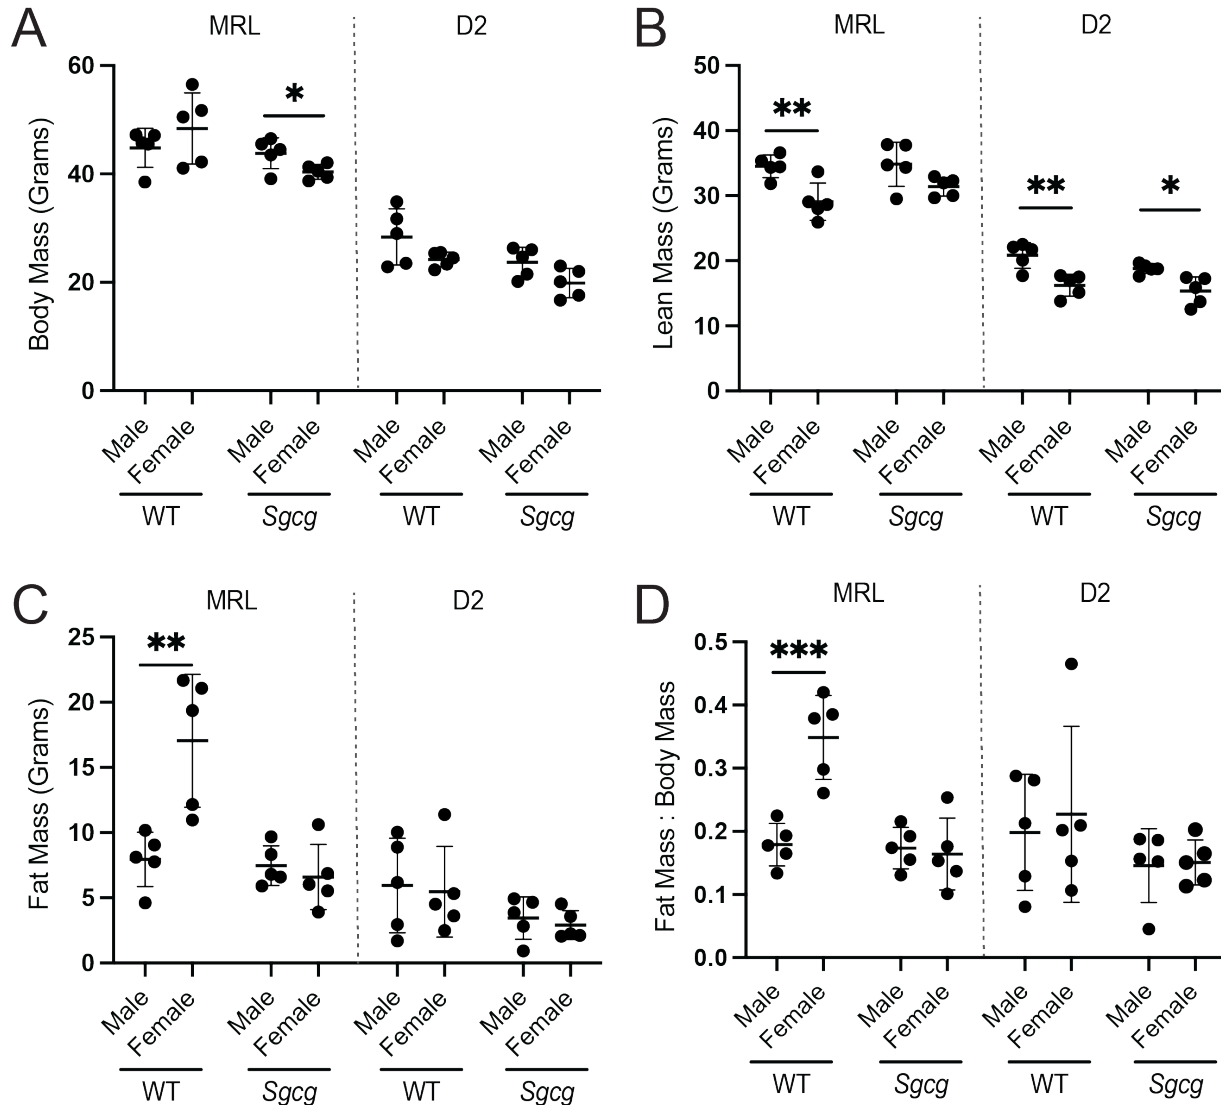

**Supplemental Figure 1. MRL mice were larger than DBA/2J (D2) mice.** Whole body mass and body mass composition analysis is shown from 5 male and 5 female mice at 20 weeks. **(A)** Body mass of the MRL strain was significantly higher than the D2 strain, and female *Sgcg*-MRL were lighter than their male counterparts. **(B)** Lean mass was less in female mice compared to male mice, except for *Sgcg*-MRL mice, where this difference was not significant. **(C)** Fat mass of the WT-MRL female MRL mice was significantly greater than WT-MRL male mice. Fat mass remained unchanged between sexes in all other cohorts. **(D)** Fat Mass: Body Mass ratio of the WT-MRL cohort was significantly greater in the females than the males in WT-MRL mice. Graphical quantification of mean  $\pm$  SD. Student's t-test was used to determine statistical significance. \*  $p < 0.05$ , \*\*  $p < 0.01$ , \*\*\*  $p < 0.001$ , \*\*\*\*  $p < 0.0001$ .

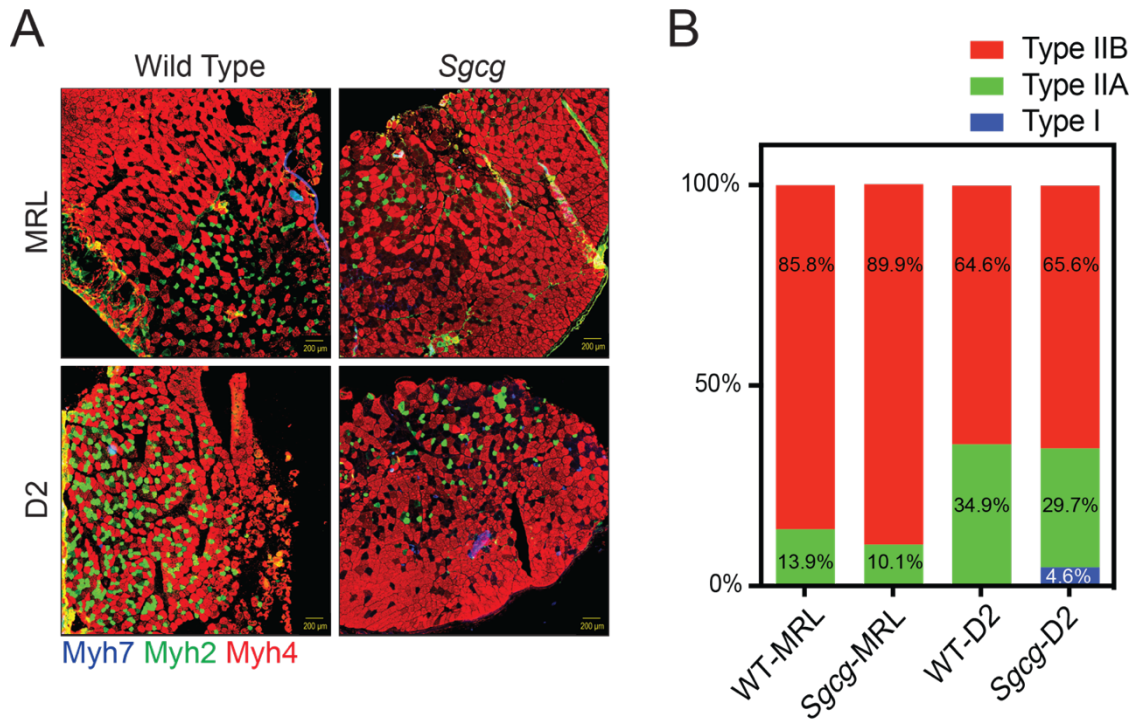

**Supplemental Figure 2. Type I fibers in *Sgcg*-D2 mice were suppressed by the MRL background.** *Tibialis anterior* (TA) muscles were harvested from 3 male mice, cryosectioned, and co-stained with antibodies to Myh7, Myh2 and Myh4. **(A)** Representative images of muscles showed a higher proportion of Myh4 positive fibers in the MRL background and a small percentage of Type I fibers in the *Sgcg*-D2 mice. **(B)** Quantified data confirms higher Myh4, lower Myh2 and lower Myh7 positive fibers in the MRL background.

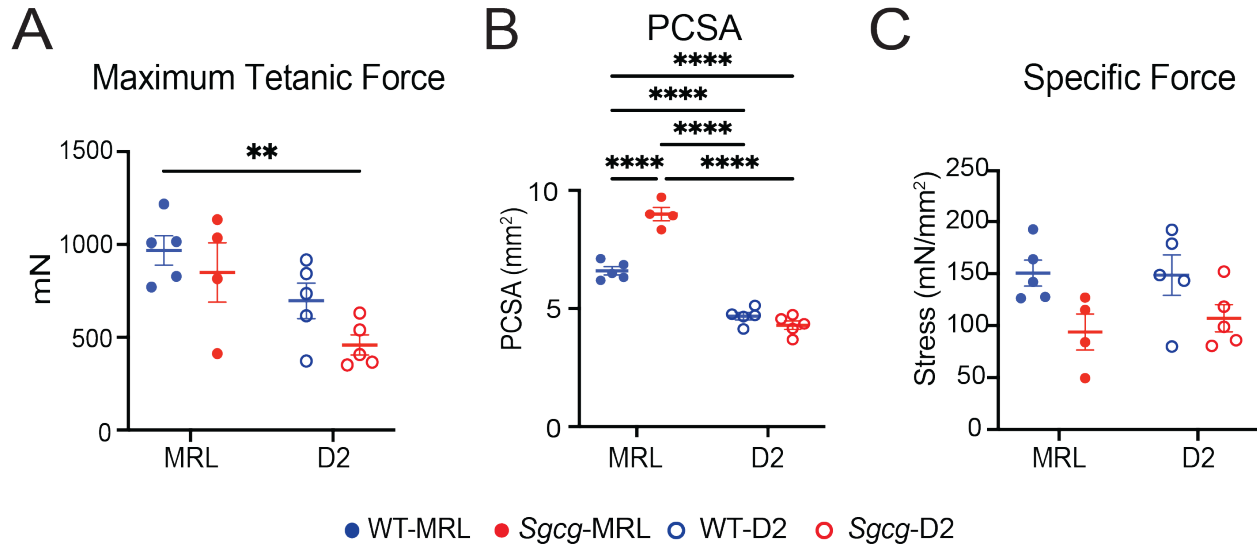

**Supplemental Figure 3. Muscle force measurements demonstrate high variability and no significant differences in force production in *Sgcg* mice from either background strain.** Muscle force mechanics were conducted on five female mice, 20 weeks of age. **(A)** The maximum tetanic force in the MRL background trended higher than D2 but did not reach significance. **(B)** Physiological Cross-Sectional Area (PCSA) of the MRL background was significantly larger. **(C)** Specific force did not differ by strain or genotype. Graphical quantification of mean  $\pm$  SD. Two-way ANOVA was used to determine statistical significance. \*  $p < 0.05$ , \*\*  $p < 0.01$ , \*\*\*  $p < 0.001$ , \*\*\*\*  $p < 0.0001$ .

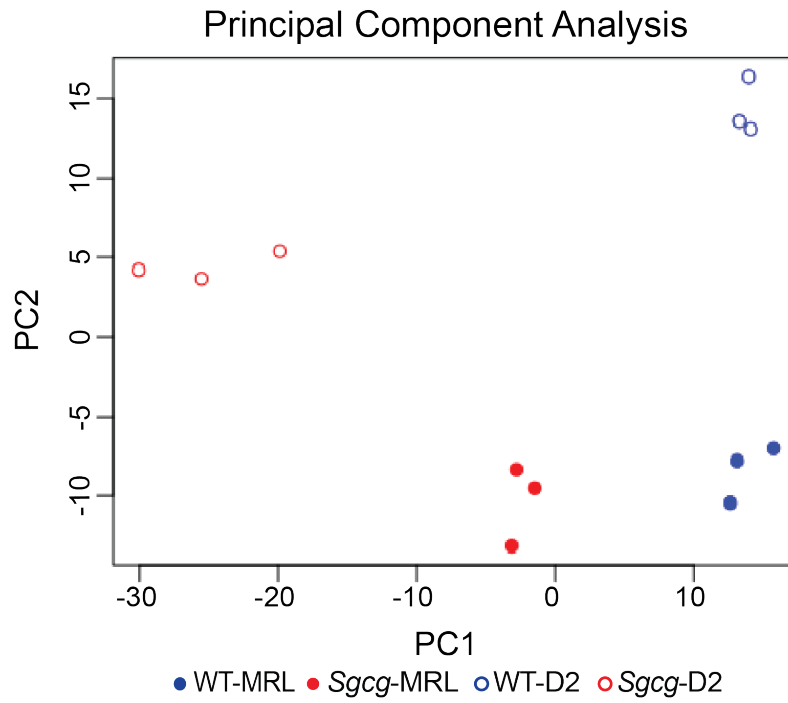

**Supplemental Figure 4.** Principal component analysis (PCA) of RNA sequencing shows distinct clustering of phenotypic cohorts.

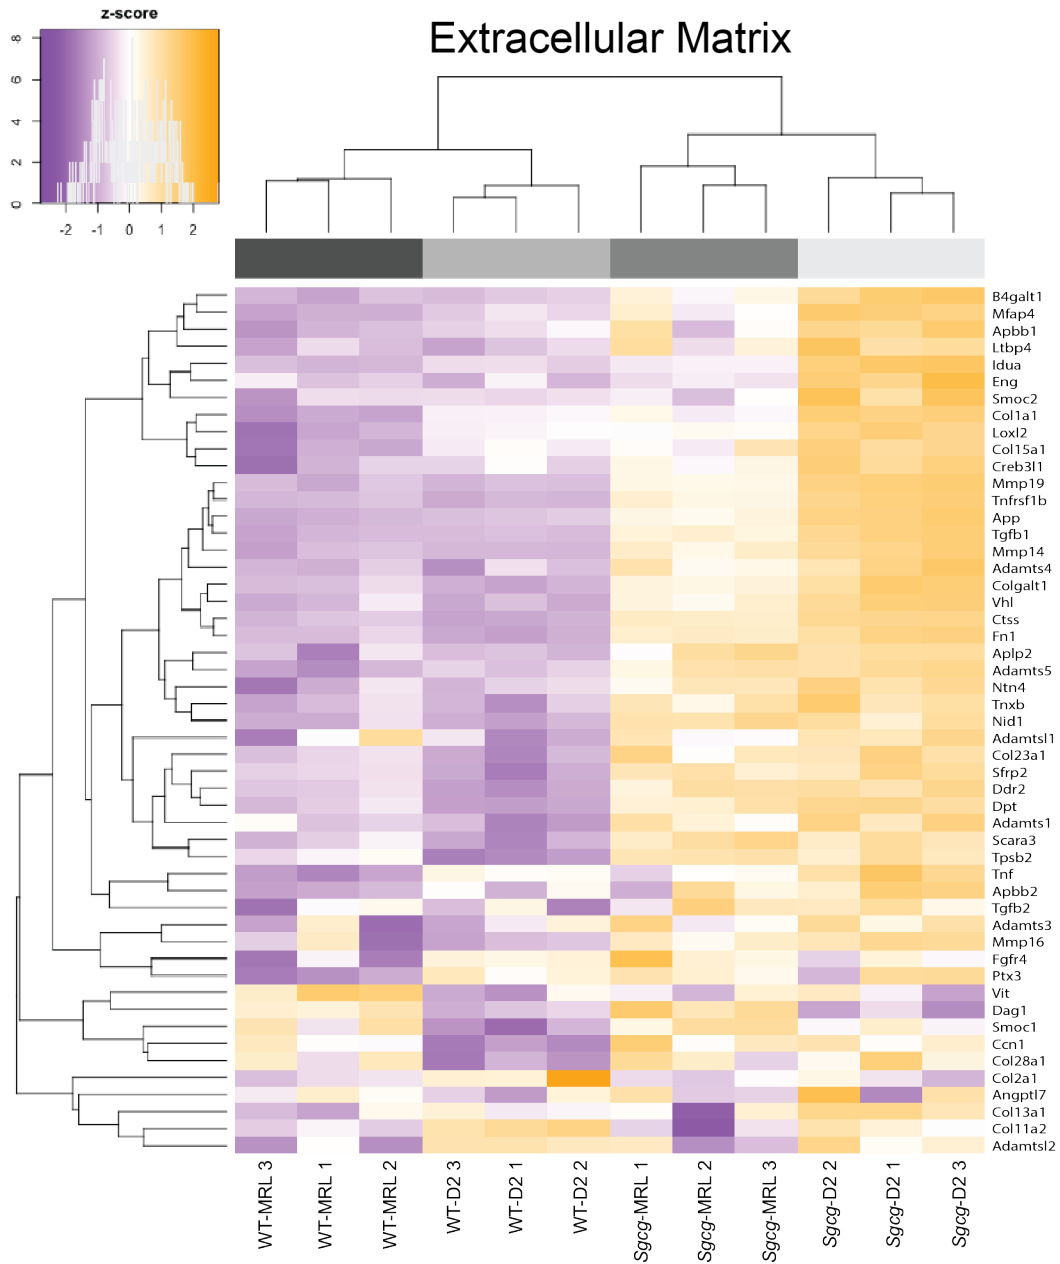

**Supplemental Figure 5.** Clustered heatmap indicates upregulation of ECM genes in the *Sgcg*-D2 muscle.

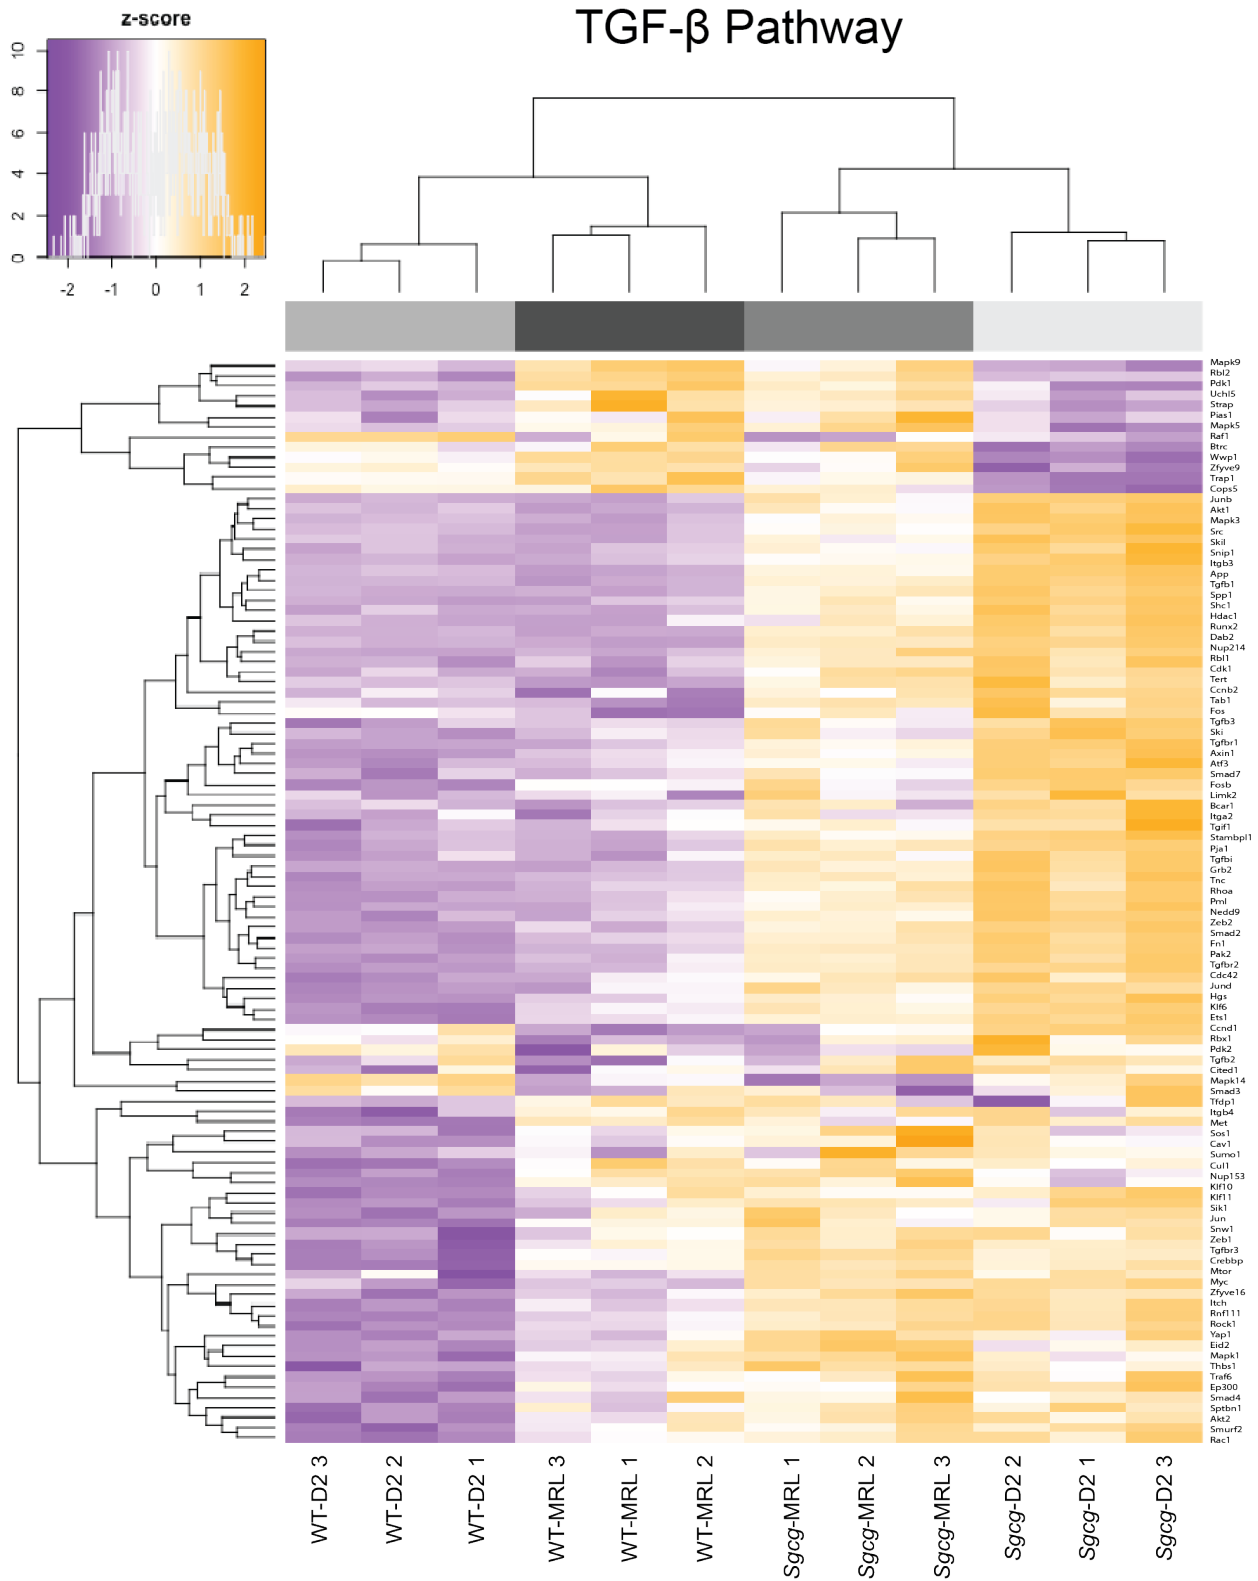

**Supplemental Figure 6.** Clustered heatmap illustrating the differential regulation of TGF- $\beta$  genes in *Sgcg*-MRL compared to *Sgcg*-D2
